# Supplementary material
Source: publisher figshare collection journal article supplement (https://sage.figshare.com/ndownloader/files/22077906)
Supplement: Supplementary file 1 [file 22077906]

Supplemental material. Picture cards and scenarios of the four sub-domains of the HSS-Kids

| Sub-domain                     | Picture cards                                                                                                                                    |                                                                                                                                                                                                                                 | Cannot answer or gave no response | Answered the repeated question correctly the second time | Answered the question correctly the first time |
|--------------------------------|--------------------------------------------------------------------------------------------------------------------------------------------------|---------------------------------------------------------------------------------------------------------------------------------------------------------------------------------------------------------------------------------|-----------------------------------|----------------------------------------------------------|------------------------------------------------|
|                                | picture card                                                                                                                                     | Scenario                                                                                                                                                                                                                        | 0                                 | 1                                                        | 2                                              |
| Factor 1<br>(Falls)            | <p>HSS1. Do not jump on the hospital bed.</p>                   | <p>My friend came to the hospital to visit me and is bored, so he tries to play hide and seek. I don't want him to get bored. What should I do?</p>                                                                             |                                   |                                                          |                                                |
|                                | <p>HSS2. Do not place your arms and legs out of bed rail.</p>  | <p>My teddy bear fell under the bed. What should I do?</p>                                                                                                                                                                      |                                   |                                                          |                                                |
|                                | <p>HSS5. Do not climb up on the window frame.</p>             | <p>It's snowing outside and I want to see snow close by. However, I can't see it, because I'm short. What should I do?</p>                                                                                                      |                                   |                                                          |                                                |
|                                | <p>HSS6. Do not climb up the toilet.</p>                      | <p>I went to the bathroom with my mom, but I found there's was no toilet paper. Therefore, my mom left the bathroom to get it. But she left, I saw a bunch of toilet paper on the shelf above the toilet. What should I do?</p> |                                   |                                                          |                                                |
|                                | <p>HSS7. Do not stand on a wheelchair.</p>                    | <p>I went for a walk to the park in the hospital in wheelchairs. There was a balloon hanging on the tree that I like. I reached out to have a balloon, but it's too high to reach. What should I do?</p>                        |                                   |                                                          |                                                |
| Factor 2<br>(General injuries) | <p>HSS9. Do not touch the injection site.</p>                                                                                                    | <p>Yesterday, the nurse gave an injection on my arm. But, next day, the injection site is too itchy. What should I do?</p>                                                                                                      |                                   |                                                          |                                                |

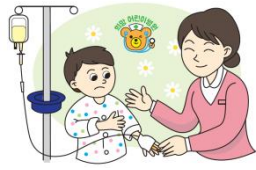

HSS10. Do not ride the pole.

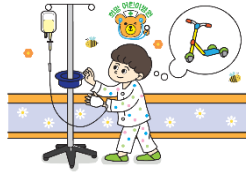

There's a movable pole using for hanging the fluid in the hospital. It looks like kickboard. What should I do?

HSS11. Do not walk barefoot without shoes.

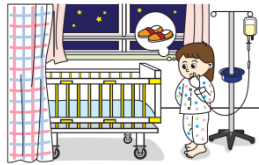

I woke up in the middle of night to pee. My mom was sleeping on the couch right next to my bed. I tried to find my shoes to go to the bathroom by myself, but I could not see them. The bathroom is only ten steps away from my bed. What should I do?

HSS14. Do not watch your cell phone while walking.

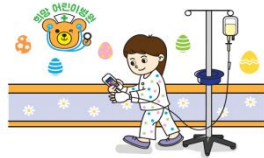

There's an interesting game on the phone. Mom allowed me to play a game for a while. I came out to the hallway to show off to the nurse. I want to keep playing games on the way. What should I do?

HSS17. Do not touch the electrical outlet near the bed or sting things inside.

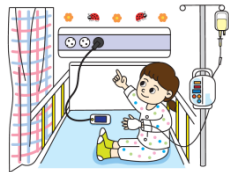

There's an electrical cord on the hospital bed using for cell phone charger, who's using it? What will happen if the children touch it?

Factor 3  
(Burns)

HSS18. Do not touch hot bowls or food.

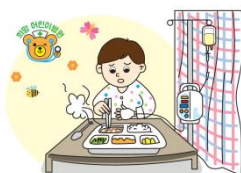

There was a hot soup for lunch at the hospital today. However, I could not eat it because I could not use spoon properly at this time. I'm so hungry and I can't wait to eat it. What are you going to do?

Factor 4  
(Medical  
devices)

HSS19. Do not touch the hot water of the water purifier.

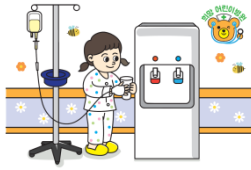

I went to the hospital lounge to get some water, because I was thirsty. There were red and blue buttons on the water purifier. I want to drink water quickly, what should I do?

HSS13. Do not touch or play with fire extinguishers.

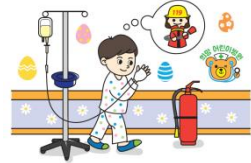

I'm playing role-playing game with my friend in the hospital. As I'm a firefighter in the role-play, I want to turn off the fire, but there is a fire extinguisher in the hallway of the hospital. What should I do?

HSS25. Do not play with hand sanitizer.

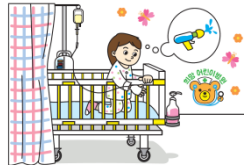

There's pink bottle hanging in front of the bed that looks like a shampoo bottle. When the nurses press it, pink liquid comes out like a water gun. I was so bored that I wanted to play with this. What should I do?

HSS26. Do not touch medical devices like infusion pumps and nebulizers.

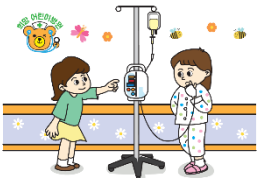

I have a machine to help administering medication. Suddenly, the machine made a noisy sound. When a nurse came and pressed the button on the machine, the noise finally stopped. What should I do?
